# Supplementary material
Source: PubMed Central journal article supplement (PMC3617845)
Supplement: SD1.pdf [file SD1.pdf]

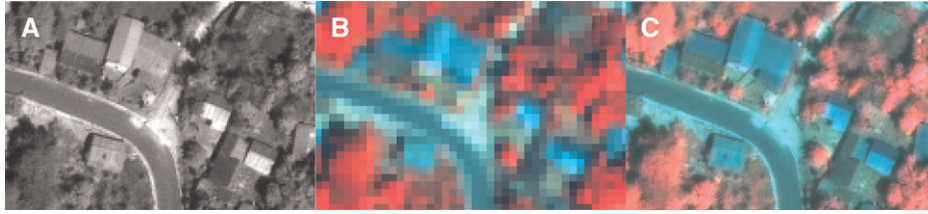

SUPPLEMENTAL FIGURE S1. High spatial resolution 0.5 m panchromatic (**A**) and 2.0 m multispectral (**B**) GeoEye satellite data were pan sharpened using the Brovey transform to visually enhance the imagery before digitizing structures and road features. The resultant enhanced image (**C**) is shown as a color infrared (CIR) composite where healthy vegetation is shown in bright red.
